# Supplementary material for: Peptide analogs isolated from Bacillus acidophilus induce cell cycle arrest and multi-aggregate formation in Candida albicans
Source: Research Square preprint supplement (doi:10.21203/rs.3.rs-6347504/v1), 2025-05-15
Supplement: Supplementary file 1 [file 768f8ec6f58342bc5ff1c2cd.xlsx]

## Sheet: Table S1
Pep	Code	Name	Classification	Mutation	Score	pen.	Area	ACE
Dod_B	6GWU	Carbonic anhydrase CaNce103p from Candida albicans	HYDROLASE	No	8576	-2.81	1218.5	-182.15
Dod_B	1YW5	Peptidyl-prolyl isomerase ESS1 from Candida albicans	ISOMERASE	No	8118	-2.39	954.7	305.84
Dod_B	6KVR	Fatty acid amide hydrolase	LIGASE	No	7762	-2.35	1022	-135.17
Dod_B	3QNE	Candida albicans seryl-tRNA synthetase	LIGASE	No	7668	-2.49	909	386.86
Dod_B	3HSK	Crystal Structure of Aspartate Semialdehyde Dehydrogenase with NADP from Candida albicans	TRANSFERASE	No	7434	-3.07	977.6	49.56
Dod_B	1AI9	CANDIDA ALBICANS DIHYDROFOLATE REDUCTASE	OXIDOREDUCTASE	No	7348	-2.4	829.7	-137.13
Dod_B	3DRA	Candida albicans protein geranylgeranyltransferase-I complexed with GGPP	TRANSFERASE	No	7330	-2.68	1052	11.64
Dod_B	5JPF	Serine/Threonine phosphatase Z1 (Candida albicans) binds to inhibitor microcystin-LR	hydrolase/RNA	No	7326	-3.02	1112.3	231.64
Dod_B	3QLR	Candida albicans dihydrofolate reductase complexed with NADPH and 6-methyl-5-[(3R)-3-(3,4,5-trimethoxyphenyl)pent-1-yn-1-yl]pyrimidine-2,4-diamine (UCP112A)	OXIDOREDUCTASE/OXIDOREDUCTASE INHIBITOR	No	7292	-2.62	962.4	-81.21
Dod_B	4LE8	Structure of the Als3 adhesin from Candida albicans, residues 1-299 (mature sequence)	OXIDOREDUCTASE/OXIDOREDUCTASE INHIBITOR	No	7126	-2.96	967.7	-279.14
Dod_B	2Y7L	Structure of N-terminal domain of Candida albicans Als9-2 in complex with human fibrinogen gamma peptide	TRANSFERASE	No	7010	-2.76	884.3	199.93
Dod_B	5N15	First Bromodomain (BD1) from Candida albicans Bdf1 in the unbound form	HYDROLASE/HYDROLASE INHIBITOR	No	6978	-2.34	812	63.59
Dod_B	1IA1	Candida albicans dihydrofolate reductase complexed with dihydro-nicotinamide-adenine-dinucleotide phosphate (NADPH) and 5-(PHENYLSULFANYL)-2,4-QUINAZOLINEDIAMINE (GW997)	OXIDOREDUCTASE	No	6966	-2.83	907.2	-53.78
Dod_B	2RIU	Alternative models for two crystal structures of Candida albicans 3,4-dihydroxy-2-butanone 4-phosphate synthase- alternate interpreation	CELL ADHESION	No	6882	-2.76	940.7	-147.83
Dod_B	1M78	CANDIDA ALBICANS DIHYDROFOLATE REDUCTASE COMPLEXED WITH DIHYDRO-NICOTINAMIDE-ADENINE-DINUCLEOTIDE PHOSPHATE (NADPH) AND 5-CHLORYL-2,4,6-QUINAZOLINETRIAMINE (GW1225)	OXIDOREDUCTASE	No	6870	-2.67	883.8	45.14
Dod_B	9CRW	Crystal structure of the Candida albicans kinesin-8 proximal tail domain	MOTOR PROTEIN	No	6856	-2.67	968.9	-228.73
Dod_B	5N13	Second Bromodomain (BD2) from Candida albicans Bdf1 in the unbound form	TRANSPORT	No	6822	-2.57	894.1	-99.66
Dod_B	5BUD	Crystal structure of Candida albicans Rai1 in complex with pU5-Mn2+	TRANSPORT PROTEIN	No	6598	-2.83	781.4	-196.71
Dod_B	1IYK	Crystal structure of candida albicans N-myristoyltransferase with myristoyl-COA and peptidic inhibitor	OXIDOREDUCTASE	No	6578	-3.15	1076.4	-96.3
Dod_B	2PB1	Exo-B-(1,3)-Glucanase from Candida Albicans in complex with unhydrolysed and covalently linked 2,4-dinitrophenyl-2-deoxy-2-fluoro-B-D-glucopyranoside at 1.9 A	UNKNOWN FUNCTION	No	6562	-2.41	801.4	-25.11
Dod_B	6KND	The C-terminal Domain of Translation Initiation Factor 5 at low pH	TRANSFERASE	No	6556	-2.77	830.7	94.63
Dod_B	5NW7	Crystal structure of candida albicans phosphomannose isomerase in complex with inhibitor	LYASE	No	6534	-3.3	959	-46.25
Dod_B	5AEZ	Crystal structure of Candida albicans Mep2	MEMBRANE PROTEIN	No	6444	-2.94	994.2	82.09
Dod_B	2RIS	Crystal structure of 3,4-dihydroxy-2-butanone 4-phosphate synthase of candida albicans- alternate interpretation	UNKNOWN FUNCTION	No	6338	-2.75	892.2	-20.04
Dod_B	1CZ1	EXO-B-(1,3)-GLUCANASE FROM CANDIDA ALBICANS AT 1.85 A RESOLUTION	HYDROLASE	No	6314	-2.44	777.9	-87.09
Dod_B	2H6S	Secreted aspartic proteinase (Sap) 3 from Candida albicans	HYDROLASE	No	6260	-2.72	904.6	48.67
Dod_B	2DKA	Crystal structure of N-acetylglucosamine-phosphate mutase, a member of the alpha-D-phosphohexomutase superfamily, in the apo-form	TRANSFERASE	No	6248	-2.37	794.8	153.7
Dod_B	2G9Z	Thiamin pyrophosphokinase from Candida albicans	TRANSFERASE	No	6066	-2.4	789.7	-228.89
Dod_B	4Y7S	Crystal Structure of the CFEM protein Csa2	CELL ADHESION	No	6060	-3.09	955.7	-149.75
Dod_B	6CPU	Crystal structure of yeast caPDE2	TRANSLATION	No	5880	-2.1	729.3	178.63
Dod_B	1NMT	N-MYRISTOYL TRANSFERASE FROM CANDIDA ALBICANS AT 2.45 A	TRANSLATION	No	5818	-2.56	722.7	-135.79
Dod_B	1Q40	Crystal structure of the C. albicans Mtr2-Mex67 M domain complex	OXIDOREDUCTASE (SUPEROXIDE ACCEPTOR)	No	5504	-3.29	747.8	3.84
Dod_B	4H97	Candida albicans dihydrofolate reductase complexed with NADPH and 5-{3-[3-methoxy-5-(4-methylphenyl)phenyl]but-1-yn-1-yl}-6-methylpyrimidine-2,4-diamine (UCP111D4M)	OXIDOREDUCTASE	No	5040	-2.61	729.2	-152.05
Dod_H	1AI9	CANDIDA ALBICANS DIHYDROFOLATE REDUCTASE	OXIDOREDUCTASE	No	6836	-3.13	866.3	-163.78
Dod_H	1CZ1	EXO-B-(1,3)-GLUCANASE FROM CANDIDA ALBICANS AT 1.85 A RESOLUTION	HYDROLASE	No	6036	-2.54	737.3	-30.81
Dod_H	1IA1	Candida albicans dihydrofolate reductase complexed with dihydro-nicotinamide-adenine-dinucleotide phosphate (NADPH) and 5-(PHENYLSULFANYL)-2,4-QUINAZOLINEDIAMINE (GW997)	OXIDOREDUCTASE	No	6530	-2.9	798.2	-200.92
Dod_H	1IYK	Crystal structure of candida albicans N-myristoyltransferase with myristoyl-COA and peptidic inhibitor	OXIDOREDUCTASE	No	6388	-2.79	885.4	-149.84
Dod_H	1M78	CANDIDA ALBICANS DIHYDROFOLATE REDUCTASE COMPLEXED WITH DIHYDRO-NICOTINAMIDE-ADENINE-DINUCLEOTIDE PHOSPHATE (NADPH) AND 5-CHLORYL-2,4,6-QUINAZOLINETRIAMINE (GW1225)	OXIDOREDUCTASE	No	6536	-2.43	851.7	-109.83
Dod_H	1NMT	N-MYRISTOYL TRANSFERASE FROM CANDIDA ALBICANS AT 2.45 A	TRANSLATION	No	4878	-2.73	667.5	-4.7
Dod_H	1Q40	Crystal structure of the C. albicans Mtr2-Mex67 M domain complex	OXIDOREDUCTASE (SUPEROXIDE ACCEPTOR)	No	4960	-2.48	617.8	62.85
Dod_H	1YW5	Peptidyl-prolyl isomerase ESS1 from Candida albicans	ISOMERASE	No	7230	-2.69	982	334.35
Dod_H	2DKA	Crystal structure of N-acetylglucosamine-phosphate mutase, a member of the alpha-D-phosphohexomutase superfamily, in the apo-form	TRANSFERASE	No	5928	-2.71	786.2	-17.62
Dod_H	2G9Z	Thiamin pyrophosphokinase from Candida albicans	TRANSFERASE	No	6188	-2.34	715.9	164.09
Dod_H	2H6S	Secreted aspartic proteinase (Sap) 3 from Candida albicans	HYDROLASE	No	6256	-2.35	706.1	-57.59
Dod_H	2PB1	Exo-B-(1,3)-Glucanase from Candida Albicans in complex with unhydrolysed and covalently linked 2,4-dinitrophenyl-2-deoxy-2-fluoro-B-D-glucopyranoside at 1.9 A	UNKNOWN FUNCTION	No	6632	-2.81	834.7	-147.17
Dod_H	2RIS	Crystal structure of 3,4-dihydroxy-2-butanone 4-phosphate synthase of candida albicans- alternate interpretation	UNKNOWN FUNCTION	No	5572	-2.07	631.2	168.83
Dod_H	2RIU	Alternative models for two crystal structures of Candida albicans 3,4-dihydroxy-2-butanone 4-phosphate synthase- alternate interpreation	CELL ADHESION	No	7082	-2.54	883.4	-187.9
Dod_H	2Y7L	Structure of N-terminal domain of Candida albicans Als9-2 in complex with human fibrinogen gamma peptide	TRANSFERASE	No	7528	-3.22	900	169.81
Dod_H	3DRA	Candida albicans protein geranylgeranyltransferase-I complexed with GGPP	TRANSFERASE	No	6848	-2.91	947.1	118.32
Dod_H	3HSK	Crystal Structure of Aspartate Semialdehyde Dehydrogenase with NADP from Candida albicans	TRANSFERASE	No	7306	-2.72	897.3	146.69
Dod_H	3QLR	Candida albicans dihydrofolate reductase complexed with NADPH and 6-methyl-5-[(3R)-3-(3,4,5-trimethoxyphenyl)pent-1-yn-1-yl]pyrimidine-2,4-diamine (UCP112A)	OXIDOREDUCTASE/OXIDOREDUCTASE INHIBITOR	No	7160	-2.78	901.7	-210.85
Dod_H	3QNE	Candida albicans seryl-tRNA synthetase	LIGASE	No	7180	-2.69	895.3	246.14
Dod_H	4H97	Candida albicans dihydrofolate reductase complexed with NADPH and 5-{3-[3-methoxy-5-(4-methylphenyl)phenyl]but-1-yn-1-yl}-6-methylpyrimidine-2,4-diamine (UCP111D4M)	OXIDOREDUCTASE	No	4754	-2.52	589.8	86.15
Dod_H	4LE8	Structure of the Als3 adhesin from Candida albicans, residues 1-299 (mature sequence)	OXIDOREDUCTASE/OXIDOREDUCTASE INHIBITOR	No	6746	-2.48	863.6	-235.06
Dod_H	4Y7S	Crystal Structure of the CFEM protein Csa2	CELL ADHESION	No	6326	-2.65	716.5	-31.15
Dod_H	5AEZ	Crystal structure of Candida albicans Mep2	MEMBRANE PROTEIN	No	6474	-2.4	751	-125.77
Dod_H	5BUD	Crystal structure of Candida albicans Rai1 in complex with pU5-Mn2+	TRANSPORT PROTEIN	No	6566	-2.44	772.5	55.98
Dod_H	5JPF	Serine/Threonine phosphatase Z1 (Candida albicans) binds to inhibitor microcystin-LR	hydrolase/RNA	No	7802	-2.54	999.7	237.81
Dod_H	5N13	Second Bromodomain (BD2) from Candida albicans Bdf1 in the unbound form	TRANSPORT	No	6856	-2.49	875.3	-79.88
Dod_H	5N15	First Bromodomain (BD1) from Candida albicans Bdf1 in the unbound form	HYDROLASE/HYDROLASE INHIBITOR	No	5580	-2.54	669.5	90.54
Dod_H	5NW7	Crystal structure of candida albicans phosphomannose isomerase in complex with inhibitor	LYASE	No	6160	-2.8	727.3	26.3
Dod_H	6CPU	Crystal structure of yeast caPDE2	TRANSLATION	No	5214	-2.72	608.9	71.98
Dod_H	6GWU	Carbonic anhydrase CaNce103p from Candida albicans	HYDROLASE	No	6034	-2.74	753.5	78.3
Dod_H	6KND	The C-terminal Domain of Translation Initiation Factor 5 at low pH	TRANSFERASE	No	6082	-2.91	757.3	122.83
Dod_H	6KVR	Fatty acid amide hydrolase	LIGASE	No	7490	-2.4	871.8	53.28
Dod_H	9CRW	Crystal structure of the Candida albicans kinesin-8 proximal tail domain	MOTOR PROTEIN	No	6398	-2.42	792	-158.39
Dod_Nat	1AI9	CANDIDA ALBICANS DIHYDROFOLATE REDUCTASE	OXIDOREDUCTASE	No	9338	-2.94	1265.6	-194.98
Dod_Nat	1CZ1	EXO-B-(1,3)-GLUCANASE FROM CANDIDA ALBICANS AT 1.85 A RESOLUTION	HYDROLASE	No	9054	-3.13	1202.5	222.63
Dod_Nat	1IA1	Candida albicans dihydrofolate reductase complexed with dihydro-nicotinamide-adenine-dinucleotide phosphate (NADPH) and 5-(PHENYLSULFANYL)-2,4-QUINAZOLINEDIAMINE (GW997)	OXIDOREDUCTASE	No	9778	-3.15	1363.2	-386.1
Dod_Nat	1IYK	Crystal structure of candida albicans N-myristoyltransferase with myristoyl-COA and peptidic inhibitor	OXIDOREDUCTASE	No	10032	-2.79	1329	-336.43
Dod_Nat	1M78	CANDIDA ALBICANS DIHYDROFOLATE REDUCTASE COMPLEXED WITH DIHYDRO-NICOTINAMIDE-ADENINE-DINUCLEOTIDE PHOSPHATE (NADPH) AND 5-CHLORYL-2,4,6-QUINAZOLINETRIAMINE (GW1225)	OXIDOREDUCTASE	No	8880	-2.77	1308.6	-219.28
Dod_Nat	1NMT	N-MYRISTOYL TRANSFERASE FROM CANDIDA ALBICANS AT 2.45 A	TRANSLATION	No	7586	-3.03	1081.5	181.33
Dod_Nat	1Q40	Crystal structure of the C. albicans Mtr2-Mex67 M domain complex	OXIDOREDUCTASE (SUPEROXIDE ACCEPTOR)	No	6956	-2.74	826.2	-188.92
Dod_Nat	1YW5	Peptidyl-prolyl isomerase ESS1 from Candida albicans	ISOMERASE	No	10018	-2.61	1198.9	79.4
Dod_Nat	2DKA	Crystal structure of N-acetylglucosamine-phosphate mutase, a member of the alpha-D-phosphohexomutase superfamily, in the apo-form	TRANSFERASE	No	7748	-2.92	1108.3	58.11
Dod_Nat	2G9Z	Thiamin pyrophosphokinase from Candida albicans	TRANSFERASE	No	7944	-2.72	1077.7	269.83
Dod_Nat	2H6S	Secreted aspartic proteinase (Sap) 3 from Candida albicans	HYDROLASE	No	8472	-2.75	1037.2	-110.65
Dod_Nat	2PB1	Exo-B-(1,3)-Glucanase from Candida Albicans in complex with unhydrolysed and covalently linked 2,4-dinitrophenyl-2-deoxy-2-fluoro-B-D-glucopyranoside at 1.9 A	UNKNOWN FUNCTION	No	8462	-3.25	1377.6	-28.52
Dod_Nat	2RIS	Crystal structure of 3,4-dihydroxy-2-butanone 4-phosphate synthase of candida albicans- alternate interpretation	UNKNOWN FUNCTION	No	7072	-3.24	963	211.24
Dod_Nat	2RIU	Alternative models for two crystal structures of Candida albicans 3,4-dihydroxy-2-butanone 4-phosphate synthase- alternate interpreation	CELL ADHESION	No	7738	-3.15	1188.5	-179.01
Dod_Nat	2Y7L	Structure of N-terminal domain of Candida albicans Als9-2 in complex with human fibrinogen gamma peptide	TRANSFERASE	No	10210	-3.04	1479.8	240.92
Dod_Nat	3DRA	Candida albicans protein geranylgeranyltransferase-I complexed with GGPP	TRANSFERASE	No	10356	-3.36	1523.9	193.88
Dod_Nat	3HSK	Crystal Structure of Aspartate Semialdehyde Dehydrogenase with NADP from Candida albicans	TRANSFERASE	No	9110	-2.92	1208.1	99.36
Dod_Nat	3QLR	Candida albicans dihydrofolate reductase complexed with NADPH and 6-methyl-5-[(3R)-3-(3,4,5-trimethoxyphenyl)pent-1-yn-1-yl]pyrimidine-2,4-diamine (UCP112A)	OXIDOREDUCTASE/OXIDOREDUCTASE INHIBITOR	No	9720	-3.38	1364.3	-352.5
Dod_Nat	3QNE	Candida albicans seryl-tRNA synthetase	LIGASE	No	9624	-2.81	1271.6	349.18
Dod_Nat	4H97	Candida albicans dihydrofolate reductase complexed with NADPH and 5-{3-[3-methoxy-5-(4-methylphenyl)phenyl]but-1-yn-1-yl}-6-methylpyrimidine-2,4-diamine (UCP111D4M)	OXIDOREDUCTASE	No	7360	-2.2	858.9	-65.58
Dod_Nat	4LE8	Structure of the Als3 adhesin from Candida albicans, residues 1-299 (mature sequence)	OXIDOREDUCTASE/OXIDOREDUCTASE INHIBITOR	No	10014	-3.25	1339.9	-269.52
Dod_Nat	4Y7S	Crystal Structure of the CFEM protein Csa2	CELL ADHESION	No	7900	-3.17	1129.6	-64.24
Dod_Nat	5AEZ	Crystal structure of Candida albicans Mep2	MEMBRANE PROTEIN	No	7850	-2.78	961.4	-90.56
Dod_Nat	5BUD	Crystal structure of Candida albicans Rai1 in complex with pU5-Mn2+	TRANSPORT PROTEIN	No	8280	-3.34	1139.4	-61.91
Dod_Nat	5JPF	Serine/Threonine phosphatase Z1 (Candida albicans) binds to inhibitor microcystin-LR	hydrolase/RNA	No	9812	-2.93	1323.5	495.81
Dod_Nat	5N13	Second Bromodomain (BD2) from Candida albicans Bdf1 in the unbound form	TRANSPORT	No	8324	-3.15	1076.2	-195.41
Dod_Nat	5N15	First Bromodomain (BD1) from Candida albicans Bdf1 in the unbound form	HYDROLASE/HYDROLASE INHIBITOR	No	7456	-2.71	993.3	-97.09
Dod_Nat	5NW7	Crystal structure of candida albicans phosphomannose isomerase in complex with inhibitor	LYASE	No	7686	-2.7	989.1	-64.31
Dod_Nat	6CPU	Crystal structure of yeast caPDE2	TRANSLATION	No	6856	-2.08	728.6	-33.71
Dod_Nat	6GWU	Carbonic anhydrase CaNce103p from Candida albicans	HYDROLASE	No	8068	-2.35	987.3	444.18
Dod_Nat	6KND	The C-terminal Domain of Translation Initiation Factor 5 at low pH	TRANSFERASE	No	8128	-2.79	1058	274.58
Dod_Nat	6KVR	Fatty acid amide hydrolase	LIGASE	No	9026	-3.16	1320.1	2.23
Dod_Nat	9CRW	Crystal structure of the Candida albicans kinesin-8 proximal tail domain	MOTOR PROTEIN	No	9656	-2.64	1373.9	-429.09
Dod_T	1AI9	CANDIDA ALBICANS DIHYDROFOLATE REDUCTASE	OXIDOREDUCTASE	No	6798	-2.42	765.1	-188.31
Dod_T	1CZ1	EXO-B-(1,3)-GLUCANASE FROM CANDIDA ALBICANS AT 1.85 A RESOLUTION	HYDROLASE	No	6346	-2.61	777.6	-70.11
Dod_T	1IA1	Candida albicans dihydrofolate reductase complexed with dihydro-nicotinamide-adenine-dinucleotide phosphate (NADPH) and 5-(PHENYLSULFANYL)-2,4-QUINAZOLINEDIAMINE (GW997)	OXIDOREDUCTASE	No	7104	-2.7	868.2	-329.52
Dod_T	1IYK	Crystal structure of candida albicans N-myristoyltransferase with myristoyl-COA and peptidic inhibitor	OXIDOREDUCTASE	No	6316	-2.6	860.7	-299.38
Dod_T	1M78	CANDIDA ALBICANS DIHYDROFOLATE REDUCTASE COMPLEXED WITH DIHYDRO-NICOTINAMIDE-ADENINE-DINUCLEOTIDE PHOSPHATE (NADPH) AND 5-CHLORYL-2,4,6-QUINAZOLINETRIAMINE (GW1225)	OXIDOREDUCTASE	No	6594	-2.78	845.1	-281.41
Dod_T	1NMT	N-MYRISTOYL TRANSFERASE FROM CANDIDA ALBICANS AT 2.45 A	TRANSLATION	No	5148	-2.32	622.7	-136.89
Dod_T	1Q40	Crystal structure of the C. albicans Mtr2-Mex67 M domain complex	OXIDOREDUCTASE (SUPEROXIDE ACCEPTOR)	No	5664	-2.74	724.2	-38.29
Dod_T	1YW5	Peptidyl-prolyl isomerase ESS1 from Candida albicans	ISOMERASE	No	6680	-2.82	860.1	115.21
Dod_T	2DKA	Crystal structure of N-acetylglucosamine-phosphate mutase, a member of the alpha-D-phosphohexomutase superfamily, in the apo-form	TRANSFERASE	No	5756	-2.88	735.7	-175.24
Dod_T	2G9Z	Thiamin pyrophosphokinase from Candida albicans	TRANSFERASE	No	5508	-2.9	828.9	117.56
Dod_T	2H6S	Secreted aspartic proteinase (Sap) 3 from Candida albicans	HYDROLASE	No	6674	-2.51	830.9	-131.36
Dod_T	2PB1	Exo-B-(1,3)-Glucanase from Candida Albicans in complex with unhydrolysed and covalently linked 2,4-dinitrophenyl-2-deoxy-2-fluoro-B-D-glucopyranoside at 1.9 A	UNKNOWN FUNCTION	No	7160	-2.79	878.2	-161.41
Dod_T	2RIS	Crystal structure of 3,4-dihydroxy-2-butanone 4-phosphate synthase of candida albicans- alternate interpretation	UNKNOWN FUNCTION	No	5880	-2.42	708.6	-98.9
Dod_T	2RIU	Alternative models for two crystal structures of Candida albicans 3,4-dihydroxy-2-butanone 4-phosphate synthase- alternate interpreation	CELL ADHESION	No	6602	-2.51	867.6	-292.06
Dod_T	2Y7L	Structure of N-terminal domain of Candida albicans Als9-2 in complex with human fibrinogen gamma peptide	TRANSFERASE	No	7280	-2.54	888	199.92
Dod_T	3DRA	Candida albicans protein geranylgeranyltransferase-I complexed with GGPP	TRANSFERASE	No	6968	-2.9	898.4	109.51
Dod_T	3HSK	Crystal Structure of Aspartate Semialdehyde Dehydrogenase with NADP from Candida albicans	TRANSFERASE	No	7090	-2.44	837	-4.71
Dod_T	3QLR	Candida albicans dihydrofolate reductase complexed with NADPH and 6-methyl-5-[(3R)-3-(3,4,5-trimethoxyphenyl)pent-1-yn-1-yl]pyrimidine-2,4-diamine (UCP112A)	OXIDOREDUCTASE/OXIDOREDUCTASE INHIBITOR	No	6222	-2.35	740.2	-207.26
Dod_T	3QNE	Candida albicans seryl-tRNA synthetase	LIGASE	No	7306	-2.88	908.5	316.98
Dod_T	4H97	Candida albicans dihydrofolate reductase complexed with NADPH and 5-{3-[3-methoxy-5-(4-methylphenyl)phenyl]but-1-yn-1-yl}-6-methylpyrimidine-2,4-diamine (UCP111D4M)	OXIDOREDUCTASE	No	5092	-2.39	626.7	-121.51
Dod_T	4LE8	Structure of the Als3 adhesin from Candida albicans, residues 1-299 (mature sequence)	OXIDOREDUCTASE/OXIDOREDUCTASE INHIBITOR	No	7006	-2.9	918.8	-284.27
Dod_T	4Y7S	Crystal Structure of the CFEM protein Csa2	CELL ADHESION	No	6712	-2.37	743.6	-115.32
Dod_T	5AEZ	Crystal structure of Candida albicans Mep2	MEMBRANE PROTEIN	No	6612	-2.23	839.6	-190.21
Dod_T	5BUD	Crystal structure of Candida albicans Rai1 in complex with pU5-Mn2+	TRANSPORT PROTEIN	No	6898	-1.81	744.7	-178.65
Dod_T	5JPF	Serine/Threonine phosphatase Z1 (Candida albicans) binds to inhibitor microcystin-LR	hydrolase/RNA	No	7024	-2.86	906.1	181.22
Dod_T	5N13	Second Bromodomain (BD2) from Candida albicans Bdf1 in the unbound form	TRANSPORT	No	6328	-2.39	740.4	4.9
Dod_T	5N15	First Bromodomain (BD1) from Candida albicans Bdf1 in the unbound form	HYDROLASE/HYDROLASE INHIBITOR	No	6148	-2.3	717.4	-37.53
Dod_T	5NW7	Crystal structure of candida albicans phosphomannose isomerase in complex with inhibitor	LYASE	No	6708	-2.48	828.4	-145.26
Dod_T	6CPU	Crystal structure of yeast caPDE2	TRANSLATION	No	5308	-2.99	766.4	53.32
Dod_T	6GWU	Carbonic anhydrase CaNce103p from Candida albicans	HYDROLASE	No	6952	-2.89	850.5	-82.11
Dod_T	6KND	The C-terminal Domain of Translation Initiation Factor 5 at low pH	TRANSFERASE	No	5834	-2.55	681.5	-41.32
Dod_T	6KVR	Fatty acid amide hydrolase	LIGASE	No	7536	-2.77	980.1	-174.62
Dod_T	9CRW	Crystal structure of the Candida albicans kinesin-8 proximal tail domain	MOTOR PROTEIN	No	6196	-2.38	777.2	-213.7
