# Supplementary material for: Peptide analogs isolated from Bacillus acidophilus induce cell cycle arrest and multi-aggregate formation in Candida albicans
Source: Research Square preprint supplement (doi:10.21203/rs.3.rs-6347504/v1), 2025-05-15
Supplement: Supplementary file 2 [file 7e19279b479975e1f71e79d8.docx]

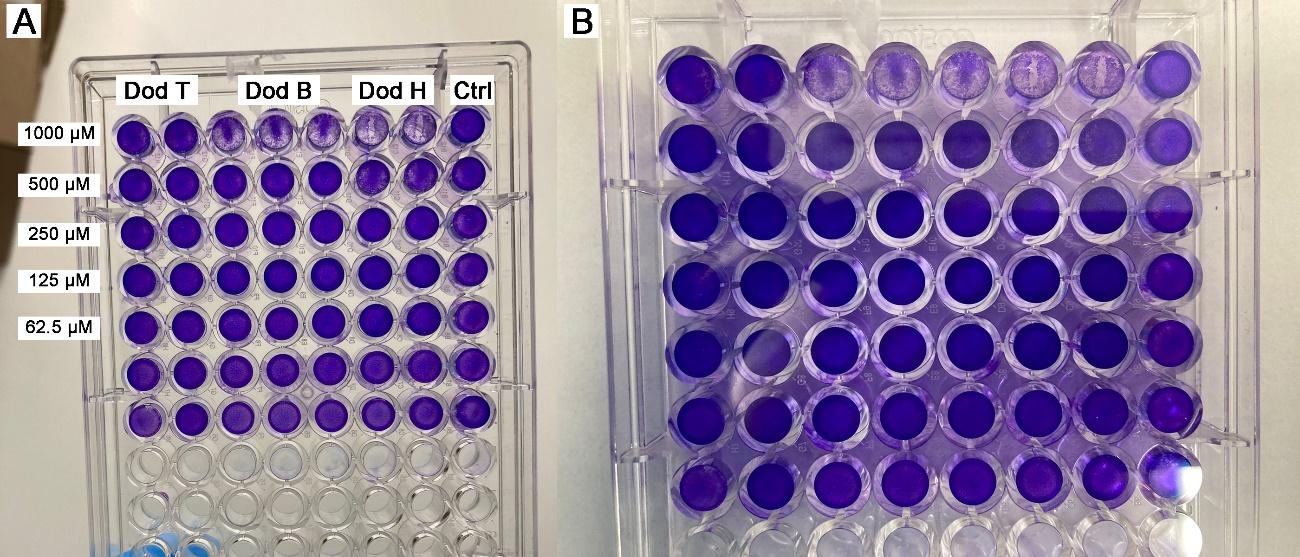


Figure S1. 96-well plate of the cytotoxicity assay.


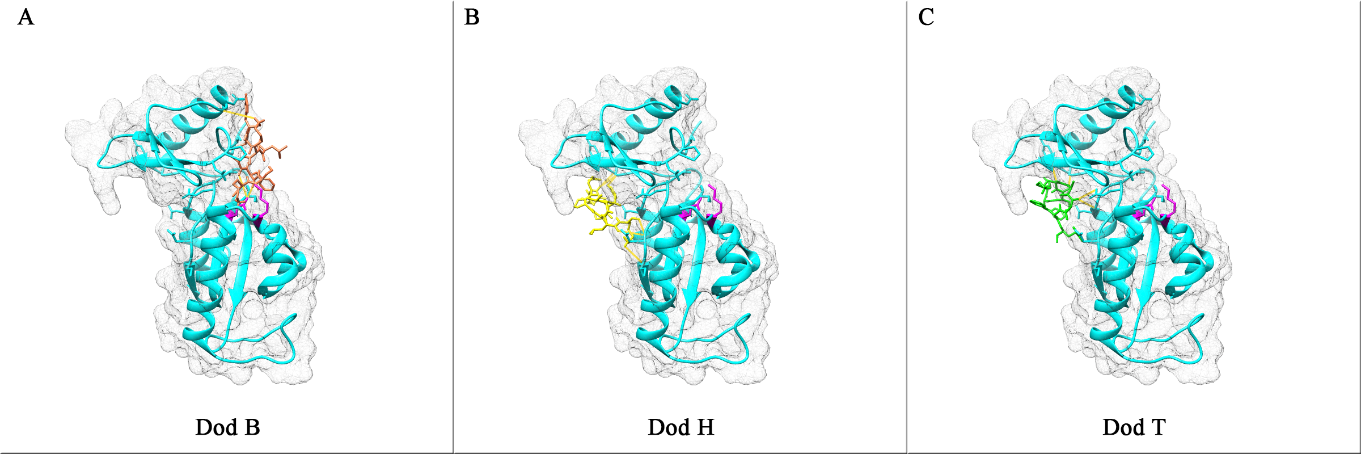


Figure S2. Molecular docking of the interaction between analogs and the peptidyl-prolyl isomerase receptor. Orange = Dod B; Yellow = Dod H; Green = Dod T; Magenta = active site of the receptor.
